# Supplementary material for: Glycoside scutellarin enhanced CD-MOF anchoring for laryngeal delivery
Source: PubMed Central journal article supplement — Acta Pharm Sin B. 2020 May 7;10(9):1709–18. doi: 10.1016/j.apsb.2020.04.015 (PMC7564328; doi:10.1016/j.apsb.2020.04.015), 2020-05-07
Supplement: mmc1.pdf [file mmc1.pdf]

## Supporting Information for

### ORIGINAL ARTICLE

## Glycoside scutellarin enhanced CD-MOF anchoring for laryngeal delivery

Kena Zhao<sup>a,b,†</sup>, Tao Guo<sup>b,†</sup>, Caifen Wang<sup>b,†</sup>, Yong Zhou<sup>b,d</sup>, Ting Xiong<sup>b,d</sup>, Li Wu<sup>b</sup>, Xue Li<sup>e</sup>, Priyanka Mittal<sup>b,f</sup>, Senlin Shi<sup>a,\*</sup>, Ruxandra Gref<sup>e,\*</sup>, Jiwen Zhang<sup>b,c,d,f,\*</sup>

<sup>a</sup>*College of Pharmaceutical Sciences, Zhejiang Chinese Medical University, Hangzhou 311402, China*

<sup>b</sup>*Center for Drug Delivery System, Shanghai Institute of Materia Medica, State Key Laboratory of Drug Research, Chinese Academy of Sciences, Shanghai 201203, China*

<sup>c</sup>*NMPA Key Laboratory for Quality Research and Evaluation of Pharmaceutical Excipients, National Institutes for Food and Drug Control, Beijing 100050, China*

<sup>d</sup>*Key Laboratory of Modern Chinese Medicine Preparations, Ministry of Education, Jiangxi University of Traditional Chinese Medicine, Nanchang 330004, China*

<sup>e</sup>*Université Paris-Saclay, CNRS 8214, Institut des Sciences Moléculaires d'Orsay, Orsay 91405, France*

<sup>f</sup>*University of Chinese Academy of Sciences, Beijing 100049, China*

Received 8 March 2020; received in revised form 3 April 2020; accepted 16 April 2020

<sup>†</sup>The authors made equal contributions to this work.

<sup>\*</sup>**Corresponding authors.** Tel./fax: +86 571 86613524 (Senlin Shi); +86 21 50805901 (Jiwen Zhang).

E-mail addresses: pjstone@163.com (Senlin Shi), ruxandra.gref@u-psud.fr (Ruxandra Gref), jwzhang@simm.ac.cn (Jiwen Zhang).

Running title: Glycoside scutellarin enhanced CD-MOF anchoring for laryngeal delivery

**Table S1** The emptying rate of SCU@CD-MOF (*n*=10).

| Number | Empty capsule weight (mg) | Capsule weight after filling (mg) | Capsule weight after NGI (mg) | Emptying rate (%) |         |      |
|--------|---------------------------|-----------------------------------|-------------------------------|-------------------|---------|------|
|        |                           |                                   |                               | Result            | Average | SD   |
| 1      | 47.10                     | 57.21                             | 47.23                         | 98.71             | 98.56   | 0.30 |
| 2      | 48.53                     | 58.49                             | 48.72                         | 98.09             |         |      |
| 3      | 47.48                     | 57.42                             | 47.62                         | 98.59             |         |      |
| 4      | 48.95                     | 59.09                             | 49.13                         | 98.22             |         |      |
| 5      | 46.74                     | 56.42                             | 46.84                         | 98.97             |         |      |
| 6      | 49.04                     | 59.00                             | 49.18                         | 98.59             |         |      |
| 7      | 46.84                     | 56.63                             | 46.97                         | 98.67             |         |      |
| 8      | 46.86                     | 56.60                             | 47.04                         | 98.15             |         |      |
| 9      | 47.45                     | 57.22                             | 47.56                         | 98.87             |         |      |
| 10     | 47.28                     | 57.25                             | 47.41                         | 98.70             |         |      |
